# Supplementary material for: Potential of Cassava Clones for Iron, Zinc, and Selenium Biofortification
Source: MDPI journal article supplement (doi:10.3390/agriculture14020268), 2024-02-07
Supplement: s1 [file s1]

**Supplementary Table S1.** ANOVA for height (H), diameter (D), chlorophyll content (CHL), yield, leaf area index (LAI), specific leaf area (SLA) of 20 cassava genotypes from South America for growing seasons.

| Source of Variability | DF | Mean Square |           |           |                      |          |             |                      |
|-----------------------|----|-------------|-----------|-----------|----------------------|----------|-------------|----------------------|
|                       |    | H           | D         | CHL       | Yield                | LAI      | SLA         | Starch               |
| Year (Y)              | 1  | 0.1610**    | 0.0716**  | 0.0019**  | 8.6124**             | 0.0901** | 24.3779**   | 8.5829**             |
| Genotype (G)          | 19 | 1.6551**    | 34.9743** | 75.9697** | 4.3273**             | 0.5243** | 1102.7094** | 66.5866**            |
| Y × G                 | 19 | 0.0431**    | 0.11626** | 0.2294**  | 0.2674 <sup>ns</sup> | 0.0033** | 4.0433**    | 0.3366 <sup>ns</sup> |

\*\* = significant at  $p < 0.01$ , ns – no significance; DF – degrees of freedom

**Supplementary Table S2.** ANOVA for Iron (Fe), Zinc (Zn), Selenium (Se) concentration in roots; and net photosynthesis rate (A), transpiration (E) and stomatal conductance ( $g_s$ ) of 20 cassava genotypes from South America for growing seasons.

| Source of Variability | DF | Mean Square          |                      |                      |            |           |          |
|-----------------------|----|----------------------|----------------------|----------------------|------------|-----------|----------|
|                       |    | Fe                   | Zn                   | Se                   | A          | E         | $g_s$    |
| Year (Y)              | 1  | 0.7179 <sup>ns</sup> | 0.9828 <sup>ns</sup> | 0.7480 <sup>ns</sup> | 59.1471**  | 11.4373** | 0.0270** |
| Genotype (G)          | 19 | 86.7110**            | 37.3117**            | 97.5051**            | 152.2901** | 19.8212** | 0.0465** |
| Y × G                 | 19 | 0.0012 <sup>ns</sup> | 0.0099 <sup>ns</sup> | 0.0024 <sup>ns</sup> | 2.9044**   | 0.0449**  | 0.0001** |

\*\* = significant at  $p < 0.01$ , ns – no significance; DF – degrees of freedom

**Supplementary Table S3.** Concentrations of nitrogen (N), phosphorus (P), potassium (K), calcium (Ca), magnesium (Mg), sulfur (S), boron (B), copper (Cu), iron (Fe), manganese (Mn), zinc (Zn) and selenium (Se) in the shoot of cassava genotypes grown in 2021/2022

| Genotypes | N                  | P     | K     | Ca    | Mg   | S                   | B     | Cu   | Fe     | Mn    | Zn                  | Se    |
|-----------|--------------------|-------|-------|-------|------|---------------------|-------|------|--------|-------|---------------------|-------|
|           | g kg <sup>-1</sup> |       |       |       |      | mg kg <sup>-1</sup> |       |      |        |       | µg kg <sup>-1</sup> |       |
| DG014     | 41.21              | 29.83 | 32.65 | 78.26 | 4.25 | 6.01                | 61.74 | 8.08 | 232.63 | 15.03 | 34.48               | 10.67 |
| DG125     | 41.84              | 28.12 | 36.17 | 71.79 | 4.28 | 6.62                | 60.36 | 8.43 | 213.90 | 27.83 | 20.39               | 10.05 |
| DG203     | 42.81              | 22.33 | 38.99 | 74.66 | 4.23 | 6.01                | 65.71 | 8.90 | 295.81 | 15.09 | 42.59               | 10.00 |
| DG707     | 42.73              | 26.25 | 32.74 | 73.62 | 4.25 | 6.19                | 63.55 | 8.99 | 292.71 | 23.59 | 28.20               | 10.63 |
| DG745     | 41.89              | 23.08 | 31.66 | 76.63 | 4.11 | 6.03                | 66.33 | 8.96 | 298.94 | 20.69 | 40.92               | 10.93 |
| DG768     | 42.39              | 22.16 | 34.37 | 74.81 | 4.24 | 6.57                | 64.88 | 8.73 | 210.60 | 29.62 | 42.01               | 10.52 |
| DG839     | 41.38              | 25.54 | 38.55 | 74.29 | 4.10 | 6.05                | 68.94 | 8.88 | 262.74 | 20.95 | 29.57               | 10.99 |
| DG848     | 42.21              | 27.03 | 32.80 | 77.05 | 4.22 | 6.67                | 63.36 | 8.08 | 282.79 | 23.01 | 34.33               | 10.67 |
| MS018     | 41.10              | 24.20 | 31.97 | 75.30 | 4.21 | 7.00                | 68.70 | 9.08 | 291.03 | 23.15 | 23.85               | 10.64 |
| MS019     | 41.80              | 21.96 | 36.39 | 77.77 | 4.17 | 6.35                | 69.50 | 8.23 | 221.79 | 22.34 | 37.54               | 10.22 |
| MS053     | 41.77              | 22.19 | 36.34 | 82.34 | 4.16 | 6.15                | 66.14 | 8.98 | 231.99 | 17.12 | 33.55               | 10.16 |
| MS055     | 42.34              | 24.16 | 38.49 | 78.12 | 4.28 | 6.77                | 62.08 | 8.13 | 211.16 | 26.89 | 41.03               | 10.34 |
| MS079     | 41.75              | 30.24 | 32.91 | 81.95 | 4.28 | 6.19                | 68.75 | 8.96 | 269.28 | 20.76 | 30.96               | 10.11 |

**Supplementary Table S4.** Concentrations of nitrogen (N), phosphorus (P), potassium (K), calcium (Ca), magnesium (Mg), sulfur (S), boron (B), copper (Cu), iron (Fe), manganese (Mn), zinc (Zn) and selenium (Se) in the shoot of cassava genotypes grown in 2022/2023

| Genotypes | N                  | P     | K     | Ca    | Mg   | S                   | B     | Cu   | Fe     | Mn    | Zn                  | Se    |
|-----------|--------------------|-------|-------|-------|------|---------------------|-------|------|--------|-------|---------------------|-------|
|           | g kg <sup>-1</sup> |       |       |       |      | mg kg <sup>-1</sup> |       |      |        |       | µg kg <sup>-1</sup> |       |
| DG014     | 42.83              | 25.11 | 37.96 | 72.90 | 4.16 | 6.31                | 60.42 | 8.29 | 258.22 | 15.39 | 20.64               | 10.37 |
| DG125     | 41.06              | 27.99 | 38.63 | 78.48 | 4.15 | 6.07                | 68.45 | 9.05 | 287.99 | 19.02 | 40.66               | 10.41 |
| DG203     | 41.81              | 25.85 | 36.92 | 76.15 | 4.18 | 6.05                | 61.96 | 9.27 | 214.00 | 16.34 | 35.93               | 10.66 |
| DG707     | 42.58              | 22.01 | 32.14 | 76.78 | 4.30 | 6.70                | 64.74 | 8.19 | 221.78 | 27.51 | 39.73               | 10.61 |
| DG745     | 42.43              | 22.78 | 31.24 | 77.90 | 4.24 | 6.18                | 61.27 | 8.86 | 209.57 | 23.60 | 42.08               | 10.98 |
| DG768     | 41.21              | 22.99 | 37.46 | 82.47 | 4.27 | 6.44                | 66.98 | 9.28 | 245.53 | 16.49 | 41.00               | 10.49 |
| DG839     | 41.14              | 23.15 | 37.80 | 76.17 | 4.27 | 6.29                | 60.96 | 8.51 | 224.66 | 29.92 | 38.21               | 10.53 |
| DG848     | 42.49              | 27.84 | 36.69 | 81.21 | 4.11 | 6.84                | 66.58 | 9.40 | 235.80 | 29.39 | 34.87               | 10.44 |
| MS018     | 42.75              | 26.08 | 32.13 | 76.40 | 4.16 | 6.59                | 65.37 | 8.75 | 289.87 | 15.27 | 32.87               | 10.91 |
| MS019     | 41.46              | 24.56 | 36.48 | 73.45 | 4.23 | 6.51                | 67.37 | 8.16 | 262.04 | 25.50 | 37.66               | 10.43 |
| MS053     | 42.50              | 27.10 | 38.20 | 71.22 | 4.24 | 6.57                | 69.17 | 8.44 | 231.06 | 16.11 | 33.42               | 10.81 |
| MS055     | 42.48              | 27.00 | 34.91 | 77.85 | 4.11 | 6.07                | 62.75 | 8.25 | 295.00 | 22.46 | 40.62               | 10.27 |
| MS079     | 42.56              | 24.47 | 34.68 | 76.54 | 4.12 | 6.40                | 68.37 | 8.83 | 284.01 | 25.60 | 40.84               | 10.77 |

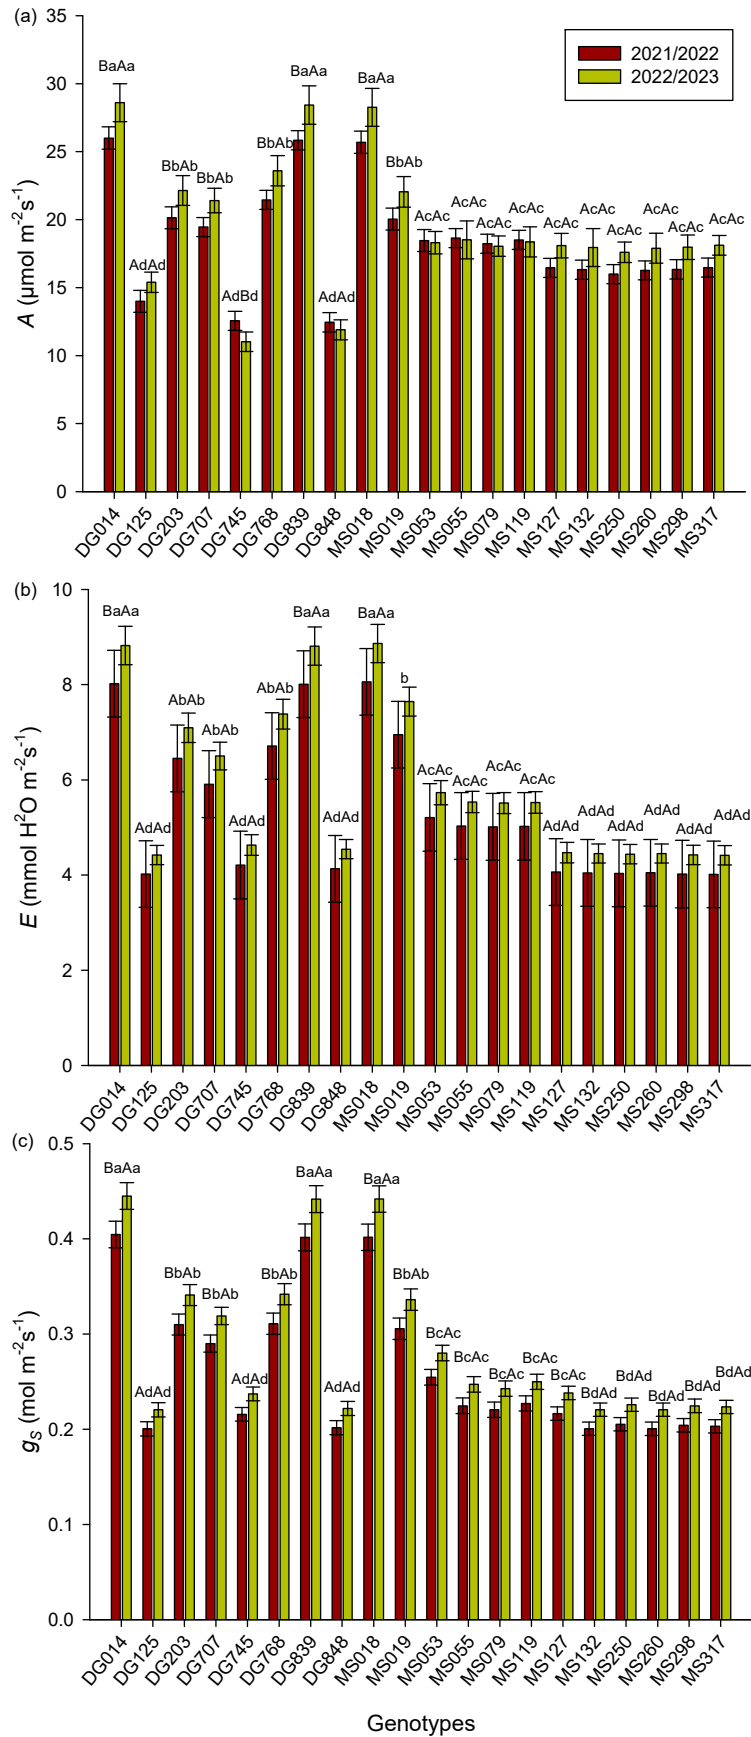

**Figure S1.** Net photosynthesis rate ( $A$ ) (a), transpiration ( $E$ ) (b) and stomatal conductance ( $g_s$ ) (c) in 20 cassava genotypes from South America (2021/2022 and 2022/2023). Different uppercase letters show differences when comparing growing seasons, and different lowercase letters indicate differences when comparing genotypes according to the Scott-Knott test (5%).
